# Supplementary material for: Improved impedance matching by multi-componential metal-hybridized rGO toward high performance of microwave absorption
Source: publisher site journal article supplement (doi:10.1515/ntrev-2021-0001), 2021-01-01
Supplement: Supplementary file 1 [file ntrev-2021-0001_sm.pdf]

# Supplementary material

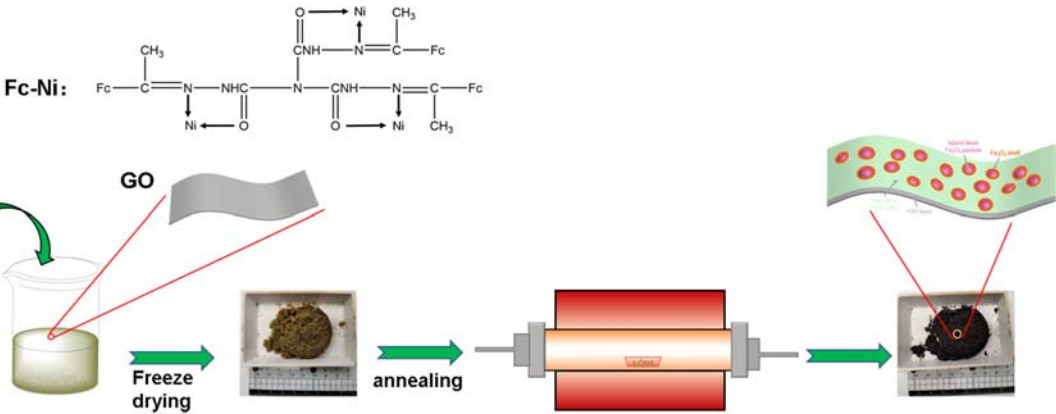

Figure S1: Schematic of the preparation process of McM/rGO.

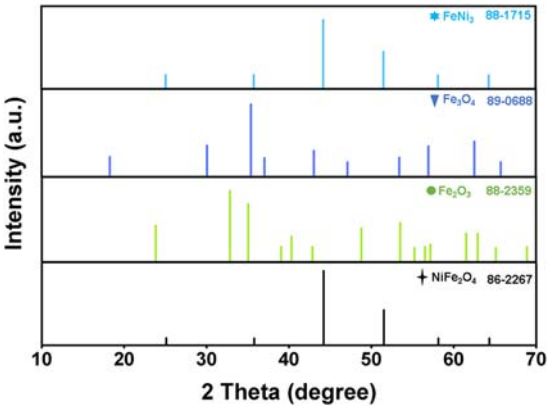

Figure S2: XRD patterns of FeNi<sub>3</sub>, Fe<sub>3</sub>O<sub>4</sub>, Fe<sub>2</sub>O<sub>3</sub>, and NiFe<sub>2</sub>O<sub>4</sub>.

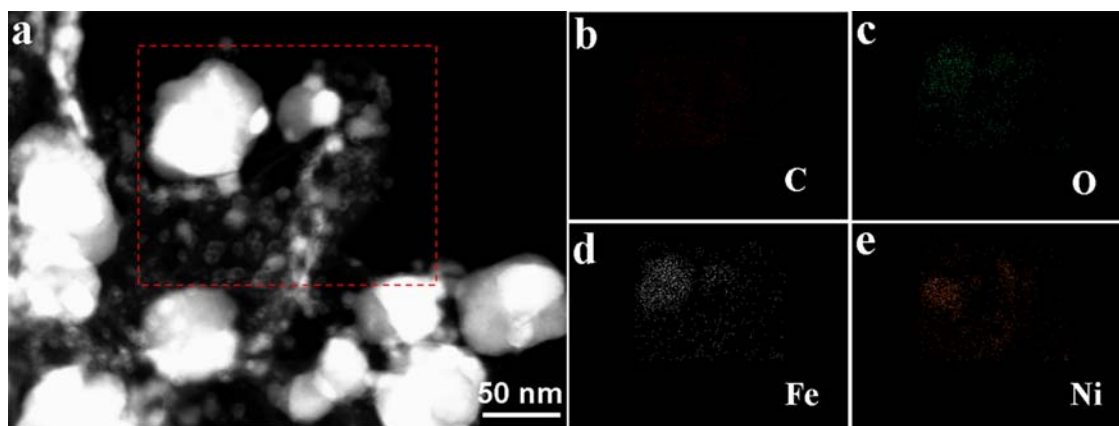

**Figure S3:** EDS mapping of McM@rGO-600.

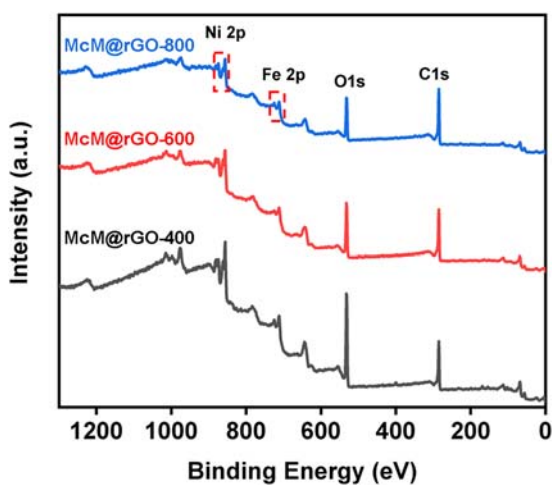

**Figure S4:** XPS curves of McM@rGO synthesized with different annealing temperatures.

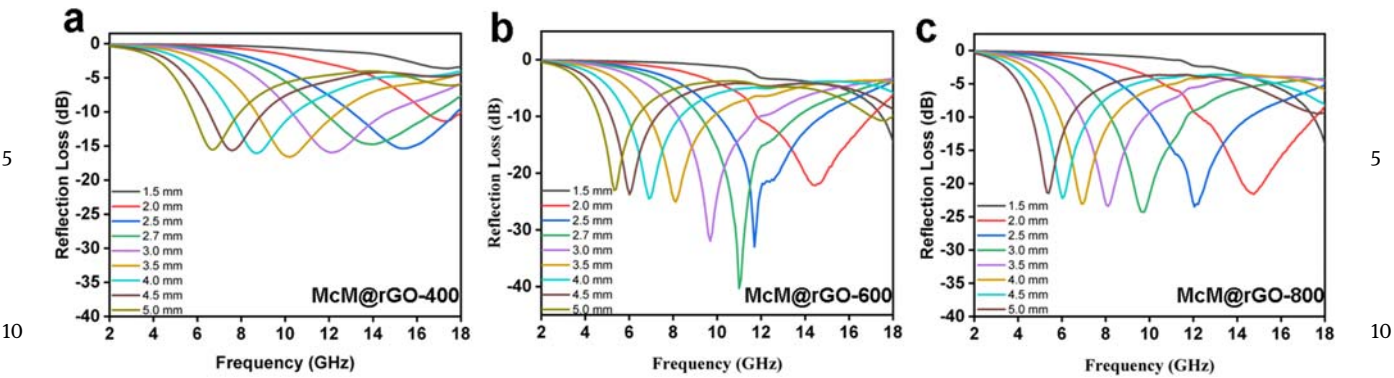

Figure S5: Reflection loss curves of McM@rGO synthesized with different annealing temperatures.
